# Supplementary material
Source: PubMed Central journal article supplement (PMC3836601)
Supplement: bc300687z_si_001.pdf [file bc300687z_si_001.pdf]

## Supporting Information

### **Thermal Stability of DNA Functionalized Gold Nanoparticles**

Feng Li,<sup>†</sup>Hongquan Zhang,<sup>‡</sup>Brittany Dever,<sup>†</sup>Xing-Fang Li,<sup>‡</sup> and X. Chris Le<sup>†,‡,\*</sup>

<sup>†</sup>Department of Chemistry, University of Alberta, Edmonton, Alberta, Canada

<sup>‡</sup>Department of Laboratory Medicine and Pathology, University of Alberta, Edmonton, Canada, T6G 2G3

\*Corresponding author.

xc.le@ualberta.ca

**Table S1.** DNA sequences used for constructing different DNA-AuNPs.

| <b>Probes</b> | <b>sequence</b>                                                          | <b>Complementary sequence</b>                             |
|---------------|--------------------------------------------------------------------------|-----------------------------------------------------------|
| SP-1          | 5 prime- <b>FAM</b> -<br>TTTCTGTCGCGCTTTTT-<br><b>ThioMC3-D</b> -3 prime | N.A.                                                      |
| SP-2          | 5 prime- <b>FAM</b> -<br>TTTCTGTCGCGCTTTTT-<br><b>ThioMC3-D</b> -3 prime | N.A.                                                      |
| SP-3          | 5 prime- <b>FAM</b> -<br>TTTCTGTCGCGCTTTTT-<br><b>DTPA</b> -3 prime      | N.A.                                                      |
| DP-1          | 5 prime- <b>FAM</b> -<br>TTTCTGTCGCGCTTTTT-<br><b>ThioMC3-D</b> -3prime  | 5 prime- <b>ThioMC6-D</b> -AAA<br>AAG CGC GAC AGA-3 prime |
| DP-2          | 5 prime- <b>FAM</b> -<br>TTTCTGTCGCGCTTTTT-<br><b>DTPA</b> -3 prime      | 5 prime- <b>ThioMC6-D</b> -AAA<br>AAG CGC GAC AGA-3 prime |
| DP-3          | 5 prime- <b>FAM</b> -<br>TTTCTGTCGCGCTTTTT-<br><b>DTPA</b> -3prime       | 5 prime- <b>DTPA</b> -AAA AAG<br>CGC GAC AGA-3 prime      |

**FAM**: carboxyfluorescein

**ThioMC3-D**: Thiol Modifier C3 S-S

**ThioMC6-D**: Thiol Modifier C6 S-S

**DTPA**: Dithiolphosphoramidite

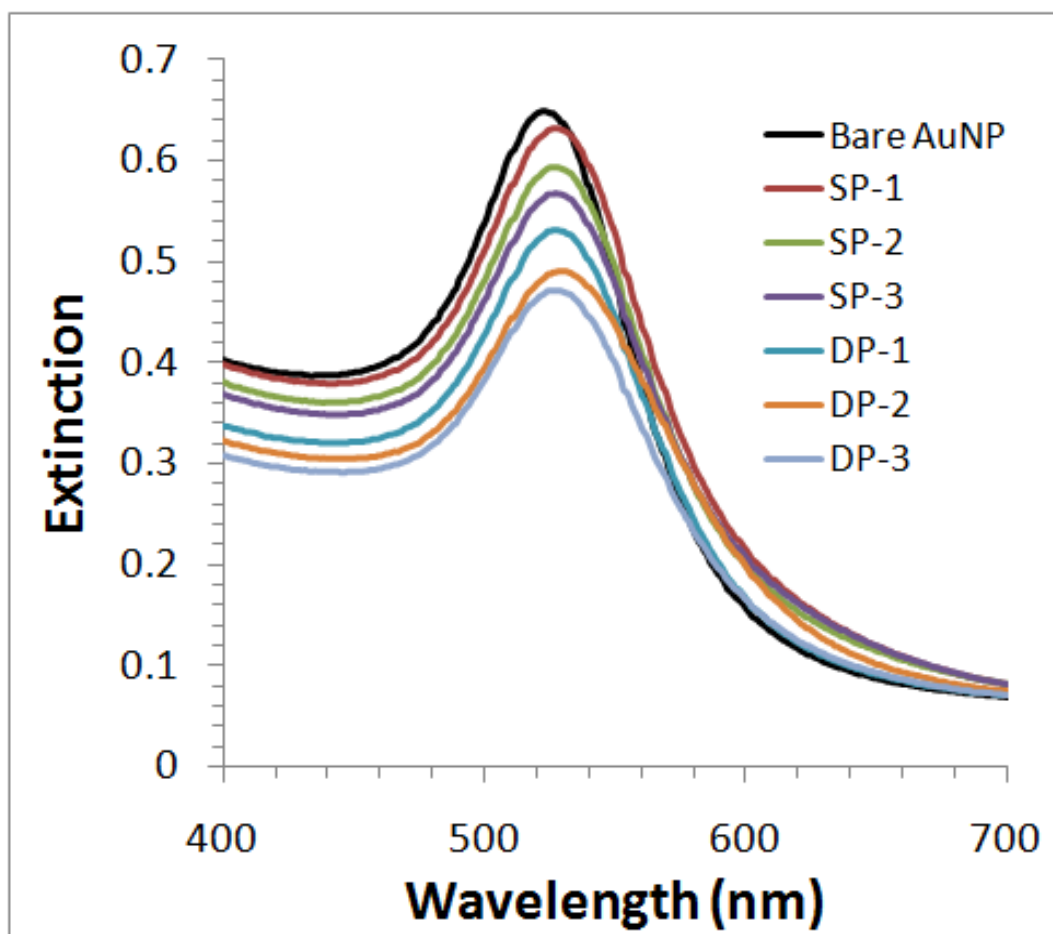

**Figure S1.** UV/Vis extinction spectra of bare gold nanoparticles (AuNPs) and DNA functionalized AuNPs (DNA-AuNPs). Unmodified AuNPs was dissolved in deionized water, and the solution showed a maximum absorption at 522 nm. The DNA-AuNPs were dissolved in  $\frac{1}{2}\times$ PBS buffer containing 0.01% Tween20. A small red shift of 5 nm was observed for all six DNA-AuNPs formed with different thiol anchor groups, indicating successful conjugation of DNA oligonucleotides on AuNPs.<sup>1</sup> No extensive aggregation was observed for any of the DNA-AuNPs. The scanning rate was 120 nm/min and spectra resolution was 1 nm.

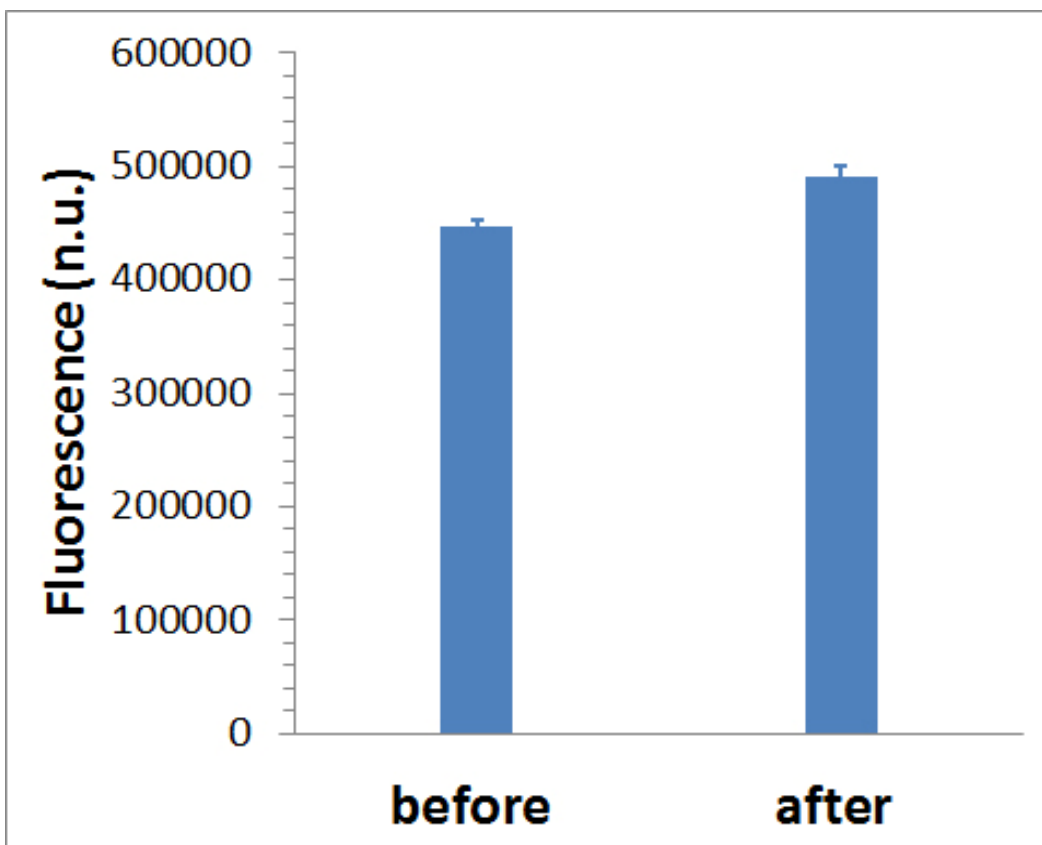

**Figure S2.** Evaluation of the inner filter effect from DNA-AuNPs. This effect was estimated by measuring fluorescence of the DNA-AuNPs solution before and after centrifugation. FAM-labeled DNA oligonucleotides (200 nM) was spiked to DNA-AuNP solution (1 nM). Half of the mixture was transferred into a 96-well microplate and its fluorescence was measured using a multi-mode microplate reader (**before** centrifugation). The other half was subject to centrifugation at 13,000 rpm for 30 min. The supernatant was then transferred to a 96-well microplate and its fluorescence was measured (**after** centrifugation). The inner filter effect was estimated to be less than 10%. Error bars represent one standard deviation from triplicate sample analyses.

**Reference:**

- (1) Jain, P. K., Qian, W., and El-Sayed, M. A. (2006) Ultrafast cooling of photoexcited electrons in gold nanoparticle-thiolated DNA conjugates involves the dissociation of the gold-thiol bond, *J. Am. Chem. Soc.* 128, 2426-2433.
